# Supplementary material for: Revealing the high activity of WO3–SBA-15 with isolated tungsten oxide species in cis-cyclooctene epoxidation
Source: Royal Society of Chemistry journal article supplement (doi:10.1039/d3nj00587a), 2023-01-01
Supplement: d3nj00587a1.pdf [file d3nj00587a1.pdf]

## Supporting Information

### Revealing the high activity of WO<sub>3</sub>-SBA-15 with isolated tungsten oxide species in cis-cyclooctene epoxidation

Penghui Li,<sup>a,b</sup> Huixiang Wang,<sup>a,c</sup> Junhua gao,<sup>a</sup> Liancheng Wang,<sup>a</sup> Jing Shi,<sup>a</sup> Yu Meng,<sup>\*d</sup> Junfen Li<sup>\*a</sup> and Baoliang Lv<sup>\*a,c</sup>

<sup>a</sup> State Key Laboratory of Coal Conversion, Institute of Coal Chemistry, Chinese Academy of Sciences, Taiyuan 030001, China

<sup>b</sup> University of Chinese Academy of Sciences, Beijing 100049, China

<sup>c</sup> School of Chemistry and Materials Science, Shanxi Normal University, Taiyuan 030031, China

<sup>d</sup> Shaanxi Key Laboratory of Low Metamorphic Coal Clean Utilization, School of Chemistry and Chemical Engineering, Yulin University, Yulin 719000, China

E-mail addresses: mengyu@yulinu.edu.cn; lijunfen@sxicc.ac.cn; lvbl@sxnu.edu.cn

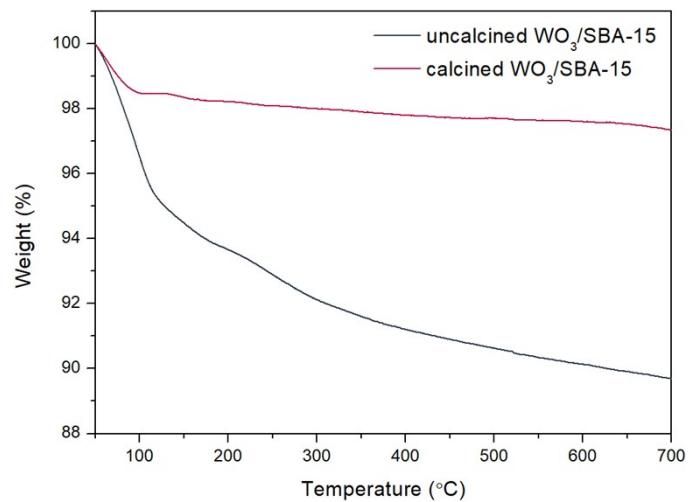

**Fig. S1.** The thermogravimetric curve of uncalcined WO<sub>3</sub>/SBA-15 and calcined WO<sub>3</sub>/SBA-15.

TG was conducted on SETSYS EVOLUTION TGA 16/18 (SETARAM Corporation, France). 10 mg of the sample was heated from 25 °C to 800 °C with a heating rate of 10 °C/min in a dynamic air atmosphere. The peroxide tungsten species are not stable enough and could pyrolyze to form tungsten oxide at around 500 °C verified by the TG analysis as reported in the literatures [1-3]. Thus, TG analysis revealed the presence of stable tungsten oxide, but not peroxides, in calcined WO<sub>3</sub>/SBA-15.

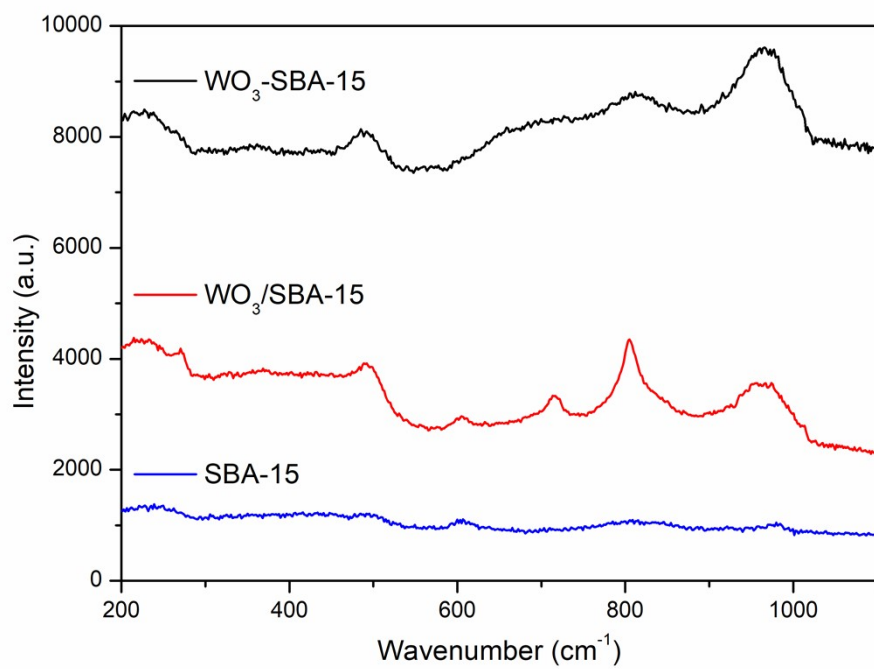

**Fig. S2.** Raman spectrum of SBA-15. (To illustrate the intensity of peaks assigning to SBA-15, the supported catalysts were also displayed)

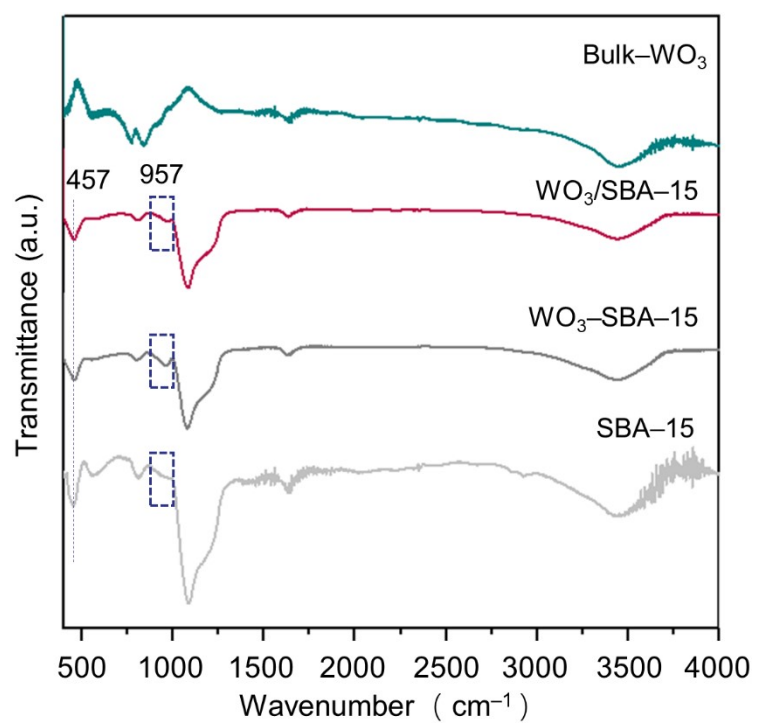

**Fig. S3.** FT-IR spectra of all samples.

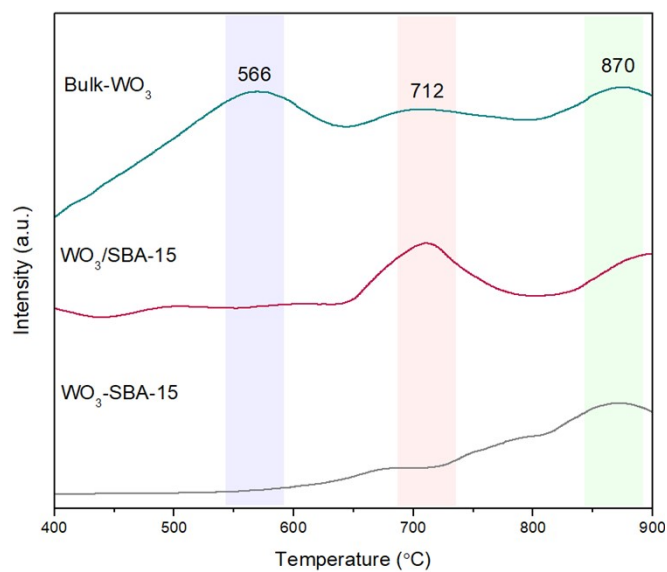

**Fig. S4.** H<sub>2</sub>-TPR profiles of the three catalysts.

H<sub>2</sub>-TPR was performed on a Xianquan 5080B apparatus. The as-prepared catalysts (100 mg) were heated at 250 °C for 1 h under an Ar stream (20 mL/min<sup>-1</sup>). After cooling down to 100 °C, the samples were reduced under a mixture stream of 10 vol% H<sub>2</sub> in Ar (20 mL/min<sup>-1</sup>) with the temperature ramping rate at 10 °C/min<sup>-1</sup>. The signal was detected with a thermal conductivity detector (TCD).

**Table S1** The equation of standard curve for quantitative analysis.

| type                  | standard curve           | Coefficients of determination (R <sup>2</sup> ) |
|-----------------------|--------------------------|-------------------------------------------------|
| cis-cyclooctene       | $y_1=1.13829x_1-0.00471$ | 0.99748                                         |
| cis-cyclooctene oxide | $y_2=1.0982x_2-0.02002$  | 0.99969                                         |

Where,  $x_1=\text{Area}(\text{cis-cyclooctene})/\text{Area}(\text{anisole})$ ,  $x_2=\text{Area}(\text{cis-cyclooctene oxide})/\text{Area}(\text{anisole})$ , the areas of cis-cyclooctene, cis-cyclooctene oxide and anisole were obtained by the corresponding peak area in gas chromatography results;  $y_1=m(\text{cis-cyclooctene})/m(\text{anisole})$ ,  $y_2=m(\text{cis-cyclooctene oxide})/m(\text{anisole})$ , the mass of anisole was obtained by weighing. The contents of cis-cyclooctene and cis-cyclooctene oxide can be calculated by bringing these values into the corresponding equations, respectively.

**Table S2.** Reaction conditions of olefin epoxidation with H<sub>2</sub>O<sub>2</sub>.

| Catalyst                                         | Solvent            | Sub.        | Oxidant <sup>a</sup>                   | n(sub.):<br>n(H <sub>2</sub> O <sub>2</sub> ) | Temp.<br>(°C) | Time<br>(h) | Con.<br>(%)     | Select.<br>(%) | Ref  |
|--------------------------------------------------|--------------------|-------------|----------------------------------------|-----------------------------------------------|---------------|-------------|-----------------|----------------|------|
| W-Zn/SnO <sub>2</sub>                            | DMC                | 1-hexene    | H <sub>2</sub> O <sub>2</sub> (60 wt%) | 5:1                                           | 60            | 4           | 96 <sup>b</sup> | 95             | [4]  |
| Nb <sub>2</sub> O <sub>5</sub> -SiO <sub>2</sub> | MeOH               | cyclooctene | H <sub>2</sub> O <sub>2</sub> (35 wt%) | 2:1                                           | 70            | 5           | 49              | 100            | [5]  |
| Nb-SiO <sub>2</sub>                              | MeOH               | cyclooctene | H <sub>2</sub> O <sub>2</sub>          | 1:1                                           | 70            | 5.          | 39              | 100.           | [6]  |
| Ag-WO <sub>3</sub>                               | CH <sub>3</sub> CN | 1-hexene    | H <sub>2</sub> O <sub>2</sub> (50 wt%) | 1:3                                           | 80            | 8           | 92              | 95             | [7]  |
| H <sub>2</sub> O-WO <sub>x</sub>                 | CH <sub>3</sub> CN | cyclooctene | H <sub>2</sub> O <sub>2</sub>          | 1:1.175                                       | 85            | 0.75        | 99.7            | 98.9           | [8]  |
| Ni/SiO <sub>2</sub> -Liq                         | CH <sub>3</sub> CN | cyclohexene | H <sub>2</sub> O <sub>2</sub>          | 1:2                                           | 90            | 4           | 65              | 74             | [9]  |
| Nb/SiO <sub>2</sub> -<br>Liq                     | CH <sub>3</sub> CN | limonene    | H <sub>2</sub> O <sub>2</sub>          | 1:2                                           | 90            | 3           | 74              | 98             | [10] |
| Nb-HAP                                           | CH <sub>3</sub> CN | limonene    | H <sub>2</sub> O <sub>2</sub>          | 1:2                                           | 90            | 6           | 39              | 62             | [11] |

<sup>a</sup> H<sub>2</sub>O<sub>2</sub> with 30 wt%. <sup>b</sup> Con (%) = n(epoxide)/n<sub>0</sub>(H<sub>2</sub>O<sub>2</sub>)\*100%.

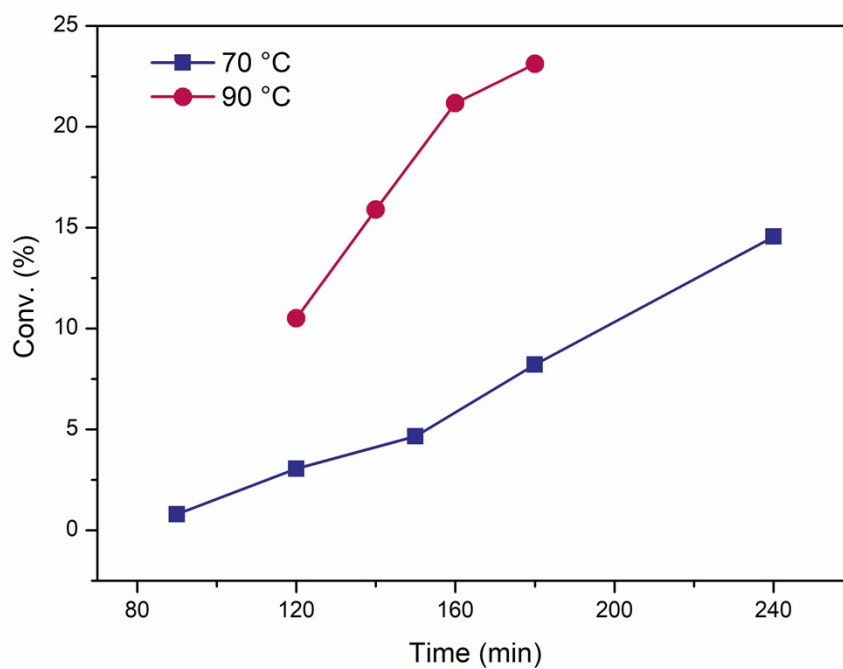

**Fig. S5.** Profiles of epoxidation of cis-cyclooctene with  $\text{H}_2\text{O}_2$  over Bulk- $\text{WO}_3$  at different temperatures.



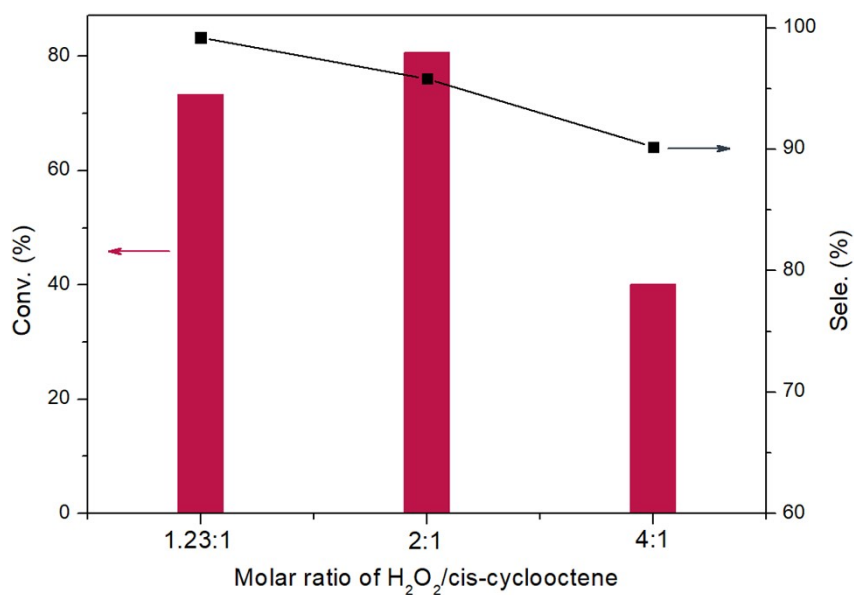

**Fig. S6.** The catalytic performance of WO<sub>3</sub>-SBA-15 with different molar ratio of H<sub>2</sub>O<sub>2</sub> to cis-cyclooctene. Reaction conditions: 0.4 mL of cis-cyclooctene, 50 mg of catalyst, 10 mL of acetonitrile, 80 °C and reaction for 1 h.

The decrease of the conversion (with the molar ratio of 4:1) might be due to the formation of an inert layer on the catalyst surface by a large amount of water, which prevented the accessibility of reactant molecules to the active sites [12].

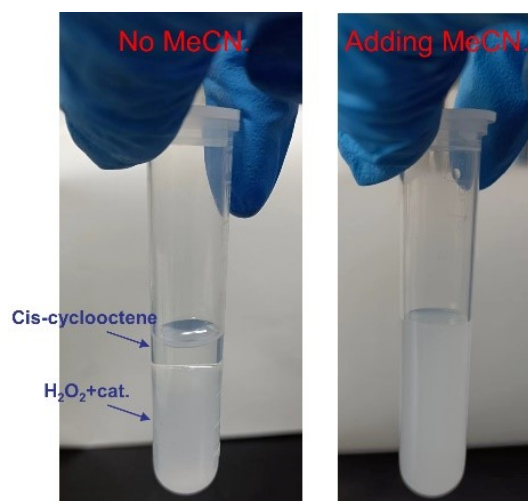

**Fig. S7.** Mutual solubility of H<sub>2</sub>O<sub>2</sub> with cis-cyclooctene in the absence and presence of acetonitrile solvent.

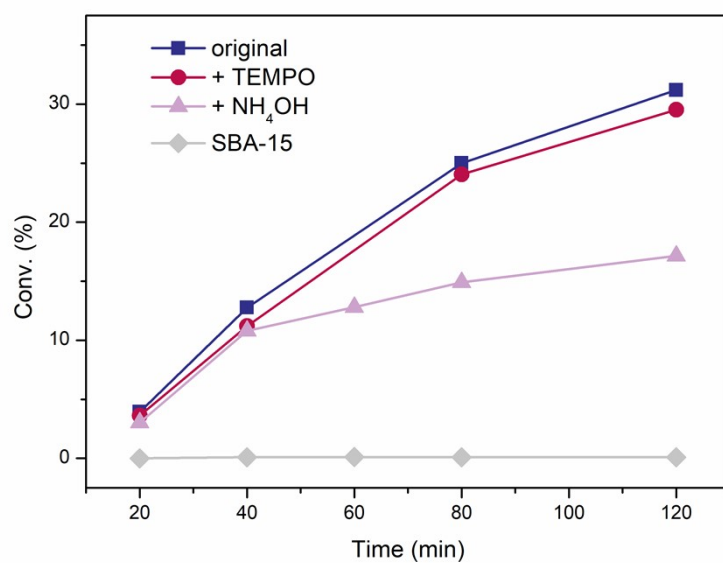

**Fig. S8.** Profiles of cis-cyclooctene epoxidation on WO<sub>3</sub>-SBA-15 at different control conditions (Original reaction conditions: 50 mg of catalyst, 0.3 mL of cis-cyclooctene, 0.3 mL of H<sub>2</sub>O<sub>2</sub> (30 wt%), 70 °C and 10 mL of acetonitrile).

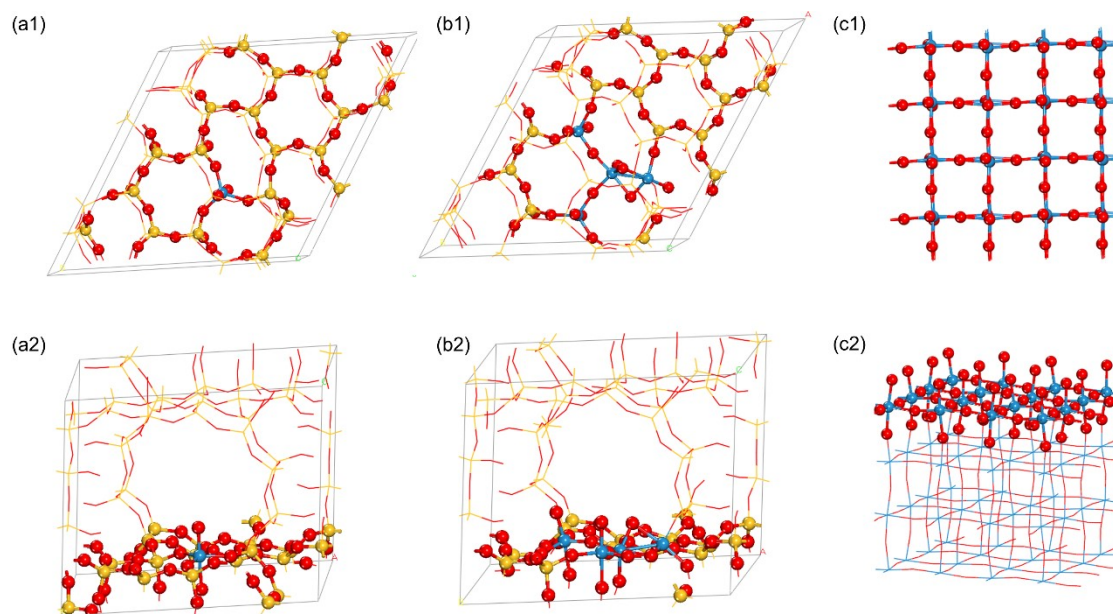

**Fig. S9.** The optimized structures of WO<sub>3</sub>-SBA-15 (a1,a2), WO<sub>3</sub>/SBA-15 (b1,b2) and Bulk-WO<sub>3</sub> (020) (c1,c2). The gold, blue and red represent Si, W and O atoms, respectively.

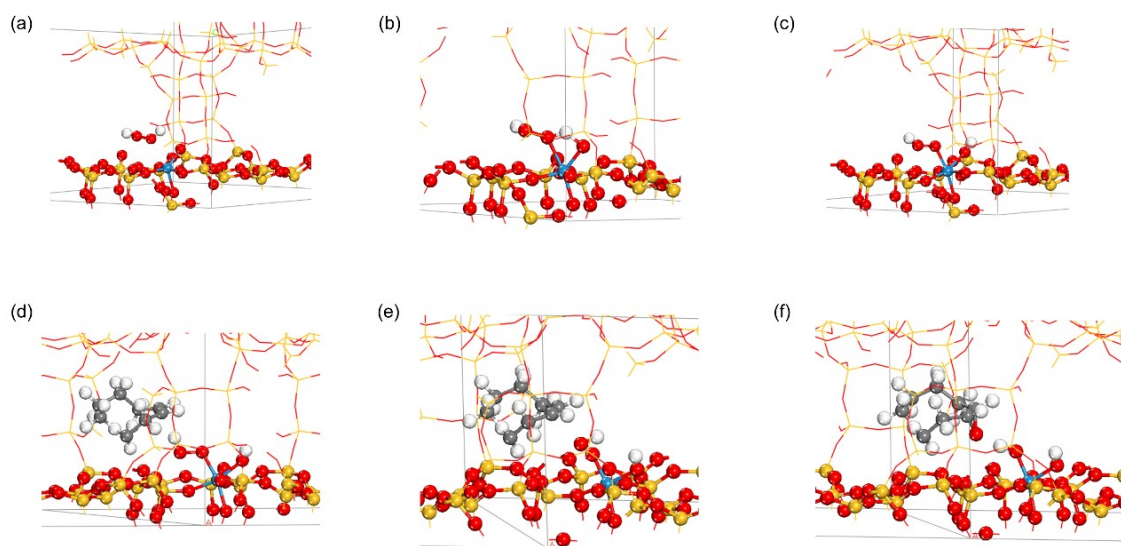

**Fig. S10.** Optimized structures of the adsorption of H<sub>2</sub>O<sub>2</sub> (intermediate 2) (a), activation of H<sub>2</sub>O<sub>2</sub> (TS1) (b), dissociation of H<sub>2</sub>O<sub>2</sub> (intermediate 3) (c), the adsorption of cis-cyclooctene (intermediate 4) (d), O transfer (TS2) (e) and desorption of cis-cyclooctene oxide (intermediate 5) (f) on WO<sub>3</sub>-SBA-15. The gold, red, blue, gray, and white spheres represent Si, O, W, C, and H atoms, respectively.

## Reference

1. S. Ren, Z. Xie, L. Cao, X. Xie, G. Qin and J. Wang, *Catal. Comm.*, 2009, **10**, 464-467.
2. H. Wang, L. Hou, C. Li, D. Zhang, P. Ma, J. Wang and J. Niu, *RSC Adv.*, 2017, **7**, 36416-36420.
3. D. Zhao, Z. Liang, H. Wang, K. Wang, D. Zhang, P. Ma, J. Wang and J. Niu, *Eur. J. Inorg. Chem.*, 2019, **2019**, 523-528.
4. K. Kamata, K. Yonehara, Y. Sumida, K. Hirata, S. Nojima and N. Mizuno, *Angew. Chem., Int. Ed.*, 2011, **50**, 12062-12066.
5. F. Somma, A. Puppinato and G. Strukul, *Appl. Catal., A*, 2006, **309**, 115-121.
6. A. Aronne, M. Turco, G. Bagnasco, G. Ramis, E. Santacesaria, M. Di Serio, E. Marenga, M. Bevilacqua, C. Cammarano and E. Fanelli, *Appl. Catal., A*, 2008, **347**, 179-185.
7. S. Ghosh, S. S. Acharyya, T. Sasaki and R. Bal, *ACS Sustainable Chem. Eng.*, 2015, **3**, 2823-2830.
8. M. Zhang, V. Singh, X. Hu, X. Ma, J. Lu, C. Zhang, J. Wang and J. Niu, *ACS Catal.*, 2019, **9**, 7641-7650.
9. C. Tiozzo, C. Bisio, F. Carniato and M. Guidotti, *Catal. Today*, 2014, **235**, 49-57.
10. A. Gallo, C. Tiozzo, R. Psaro, F. Carniato and M. Guidotti, *J. Catal.*, 2013, **298**, 77-83.
11. P. Carniti, A. Gervasini, C. Tiozzo and M. Guidotti, *ACS Catal.*, 2014, **4**, 469-479.
12. P. Sudarsanam, N. K. Gupta, B. Mallesham, N. Singh, P. N. Kalbande, B. M. Reddy, B. F. Sels, *ACS Catal.*, 2021, **11**, 13603-13648.
